# Supplementary material for: Structural Insights into the Ligand–LsrK Kinase Binding Mode: A Step Forward in the Discovery of Novel Antimicrobial Agents
Source: MDPI journal article supplement (doi:10.3390/molecules28062542), 2023-03-10
Supplement: s1 [file s1]

## Structural insights into the ligand-LsrK kinase binding mode. A step forward in the discovery of novel antimicrobial agents.

Roberta Listro,<sup>1</sup> Giorgio Milli,<sup>1,2</sup> Angelica Pellegrini,<sup>2</sup> Chiara Motta,<sup>2</sup> Valeria Cavalloro,<sup>3</sup> Emanuela Martino,<sup>3</sup> Johannes Kirchmair,<sup>4</sup> Giampiero Pietrocola,<sup>2,\*</sup> Daniela Rossi,<sup>1</sup> Pasquale Linciano,<sup>1,\*</sup> Simona Collina<sup>1</sup>

<sup>1</sup> Department of Drug Sciences, University of Pavia, viale Taramelli 12, 27100 Pavia, Italy;

<sup>2</sup> Department of Molecular Medicine, Biochemistry unit, University of Pavia, 27100 Pavia, Italy;

<sup>3</sup> Department of Earth and Environmental Sciences, University of Pavia, Via Sant 'Epifanio 14, Pavia, 27100, Italy;

<sup>4</sup> Division of Pharmaceutical Chemistry, Department of Pharmaceutical Sciences, University of Vienna, Vienna, 1090, Austria

\* Correspondence: P.L. E-mail: pasquale.linciano@unipv.it. Address: Department of Drug Science, University of Pavia, viale Taramelli 12, 27100, Pavia, Italy. G.P. E-mail: giampiero.pietrocola@unipv.it. Address: Department of Molecular Medicine, Biochemistry unit, University of Pavia, viale Taramelli 3/b, 27100 Pavia, Italy

### Table of Content

|                                                                                                                                                               |         |
|---------------------------------------------------------------------------------------------------------------------------------------------------------------|---------|
| <b>Figure SI-1.</b> Chemical structure, LsrK inhibitory activity and approach exploited for the identification of the LsrK inhibitors reported in literature. | ...SI-2 |
| <b>Table SI-1.</b> Percentage of secondary structural components in LsrK.                                                                                     | ...SI-3 |

## SUPPORTING INFORMATION

A

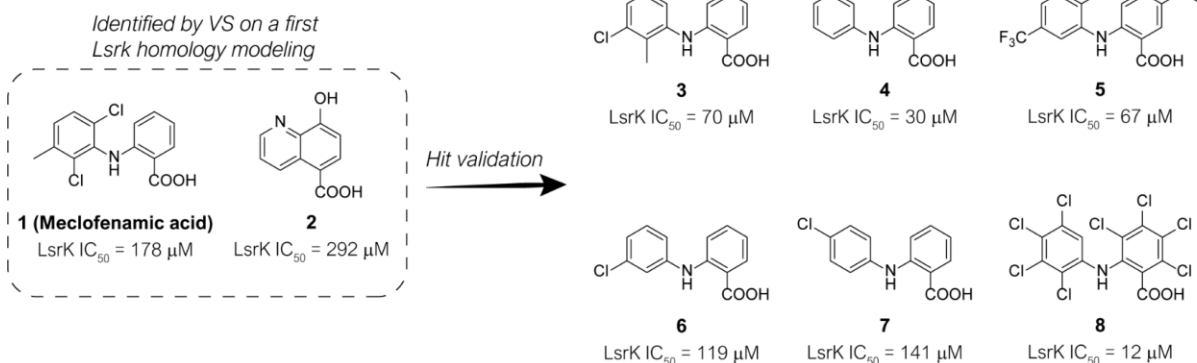

B

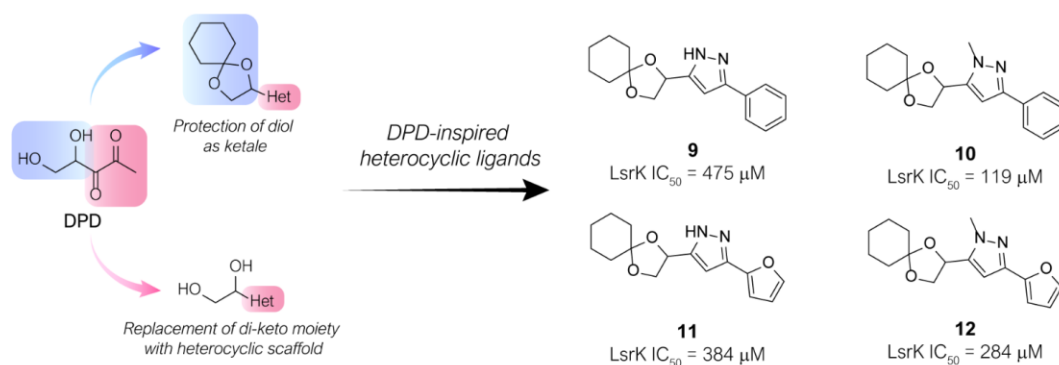

C

Hits identified by target-based HTS

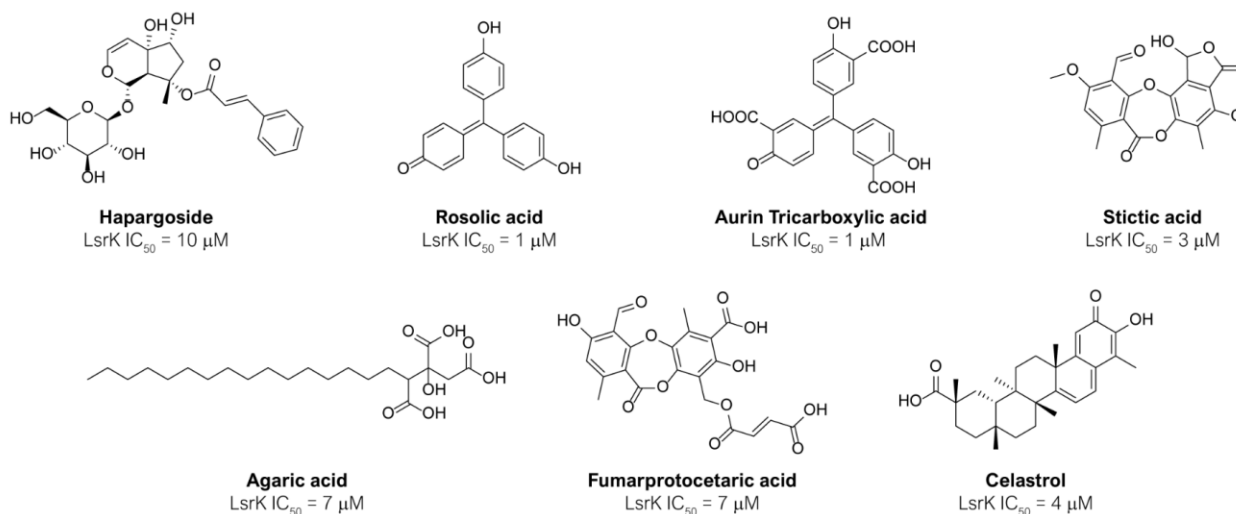

**Figure SI-1.** Chemical structure, LsrK inhibitory activity and approach exploited for the identification of the LsrK inhibitors reported in literature.

## SUPPORTING INFORMATION

**Table SI-1.** Percentage of secondary structural components in LsrK.

|                                            | <b><math>\alpha</math>-Helix</b> | <b><math>\beta</math>-Strand</b> | <b>Turns</b>    | <b>Other</b>     |
|--------------------------------------------|----------------------------------|----------------------------------|-----------------|------------------|
| from UV-CD spectra <sup>a</sup>            | 44.4 $\pm$ 1.5 %                 | 16.9 $\pm$ 2.4 %                 | 3.2 $\pm$ 0.3 % | 35.7 $\pm$ 0.3 % |
| from apo-LsrK X-ray structure <sup>b</sup> | 39.6 %                           | 20.4 %                           |                 | 37.9 %           |

a. The values are an average of results obtained using the BestSel deconvolution programs.; b. calculated with the EMBL-EBI PDBsum utility
